# Supplementary material for: Safety of Dihydroartemisinin-Piperaquine Versus Artemether-Lumefantrine For the Treatment of Uncomplicated Plasmodium Falciparum Malaria Among Children in Africa: a Systematic Review and Meta-Analysis of Randomized Control Trials
Source: Research Square preprint supplement (doi:10.21203/rs.3.rs-746101/v2), 2021-09-27
Supplement: Supplementary file 1 [file b2e816849aaf15b49863aaa1.docx]

**
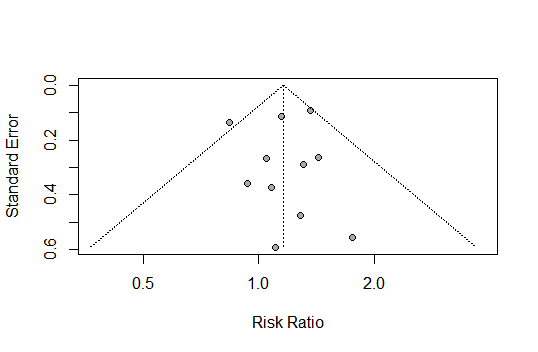
**

Additional file S5: Funnel plot of comparison: dihydroartemisinin-piperaquine versus artemether-lumefantrine for treatment of uncomplicated *plasmodium falciparum* malaria among children in Africa, outcome: Gastrointestinal adverse events (diarrhea).
